# Supplementary material for: South American 2020 regional smoke plume: intercomparison with previous years, impact on solar radiation, and the role of Pantanal biomass burning season
Source: Copernicus journal article supplement (doi:10.5194/acp-22-15021-2022), 2022-11-24
Supplement: Supplementary file 1 [file acp-22-15021-2022-supplement.pdf]

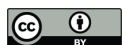

*Supplement of*

**South American 2020 regional smoke plume: intercomparison with previous years, impact on solar radiation, and the role of Pantanal biomass burning season**

**Nilton Évora do Rosário et al.**

*Correspondence to:* Nilton Évora do Rosário (nrosario@unifesp.br)

The copyright of individual parts of the supplement might differ from the article licence.

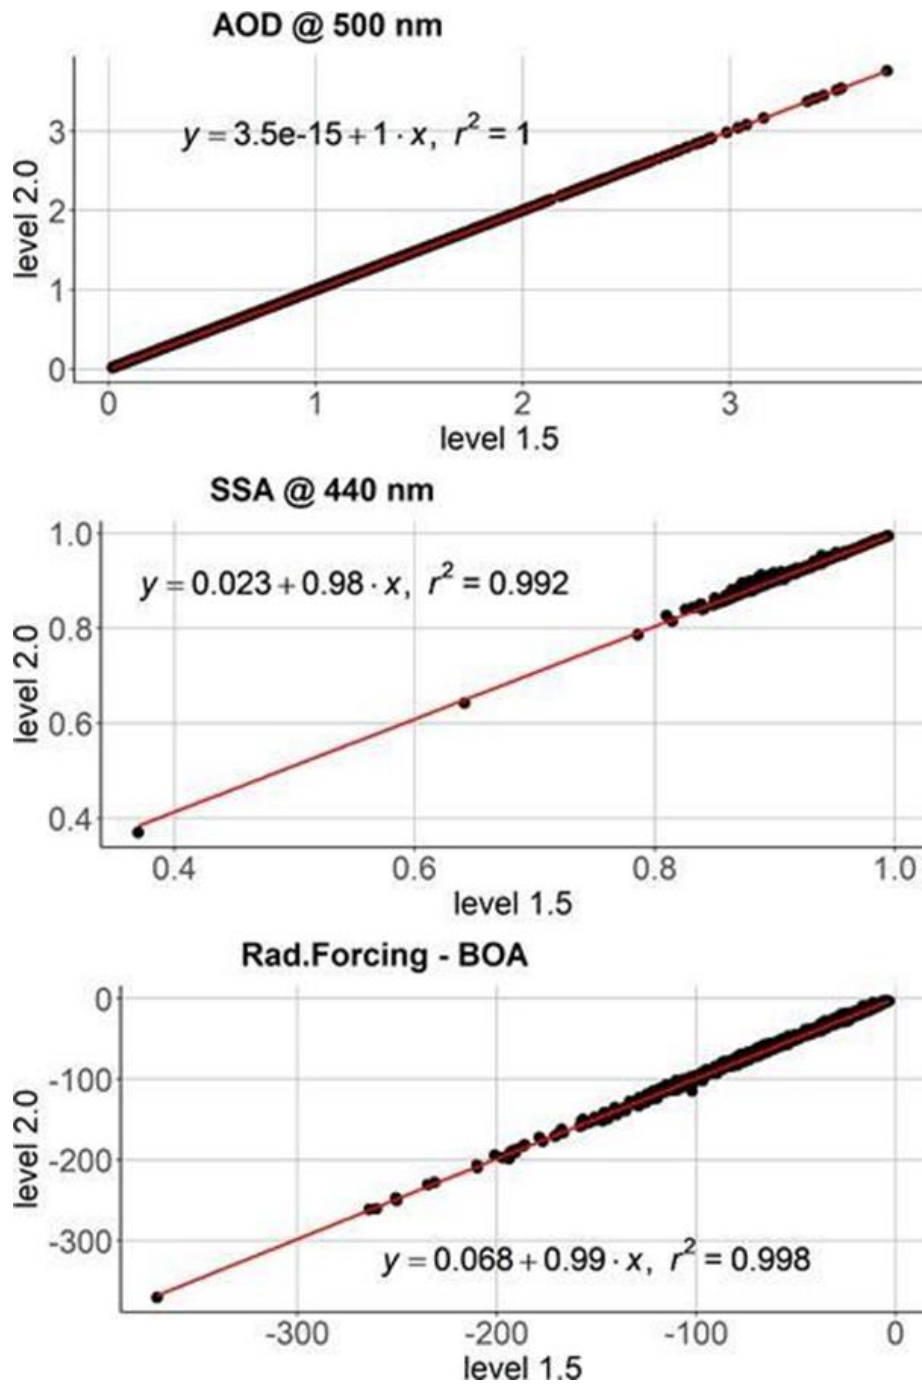

Figure S1: Scatterplot of level 2.0 versus level 1.5 for AOD at 500 nm, SSA at 440 nm and radiative forcing at the surface from AERONET. Red line indicates the best line fit and the coefficients of the linear regression are also presented.
